# Supplementary material
Source: PubMed Central journal article supplement (PMC6641960)
Supplement: ao8b00560_si_001.pdf [file ao8b00560_si_001.pdf]

# Supporting information

## Friedel-Crafts Alkylation over Zr-Mont Catalyst for the Production of Diesel Fuel Precursors

Suhas H. Shinde and Chandrashekar V. Rode\*

Chemical Engineering and Process Development Division, CSIR-National Chemical Laboratory, Dr. Homi Bhabha road, Pune-411008. \*Corresponding author: Email: [cv.rode@ncl.res.in](mailto:cv.rode@ncl.res.in), Fax: +91 20 2590 2621, Telephone: +91 20 2590 2349.

---

### Content

1. Catalyst Characterisation
2. Experimental procedure for synthesis of HMF derivatives
3. Characterisation and confirmation of products

|                                                                      |    |
|----------------------------------------------------------------------|----|
| <sup>1</sup> H NMR of 5-(2,4,6-trimethylbenzyl)furan-2-carbaldehyde  | S3 |
| <sup>13</sup> C NMR of 5-(2,4,6-trimethylbenzyl)furan-2-carbaldehyde |    |
| <sup>1</sup> H NMR of 5-(2,6-dimethylbenzyl)furan-2-carbaldehyde     | S4 |
| <sup>13</sup> C NMR of 5-(2,6-dimethylbenzyl)furan-2-carbaldehyde    |    |
| <sup>1</sup> H NMR of 5-(4-methylbenzyl)furan-2-carbaldehyde         | S5 |
| <sup>13</sup> C NMR of 5-(4-methylbenzyl)furan-2-carbaldehyde        |    |
| <sup>1</sup> H NMR of 5-(acetoxymethyl)furfural                      | S6 |
| <sup>13</sup> C NMR of 5-(acetoxymethyl)furfural                     |    |
| <sup>1</sup> H NMR of 5-(formyloxymethyl)furfural                    | S7 |
| <sup>13</sup> C NMR of 5-(formyloxymethyl)furfural                   |    |
| <sup>1</sup> H NMR of 5-(chloromethyl)furfural                       | S8 |
| <sup>13</sup> C NMR of 5-(chloromethyl)furfural                      |    |

## 1. Catalyst Characterisation

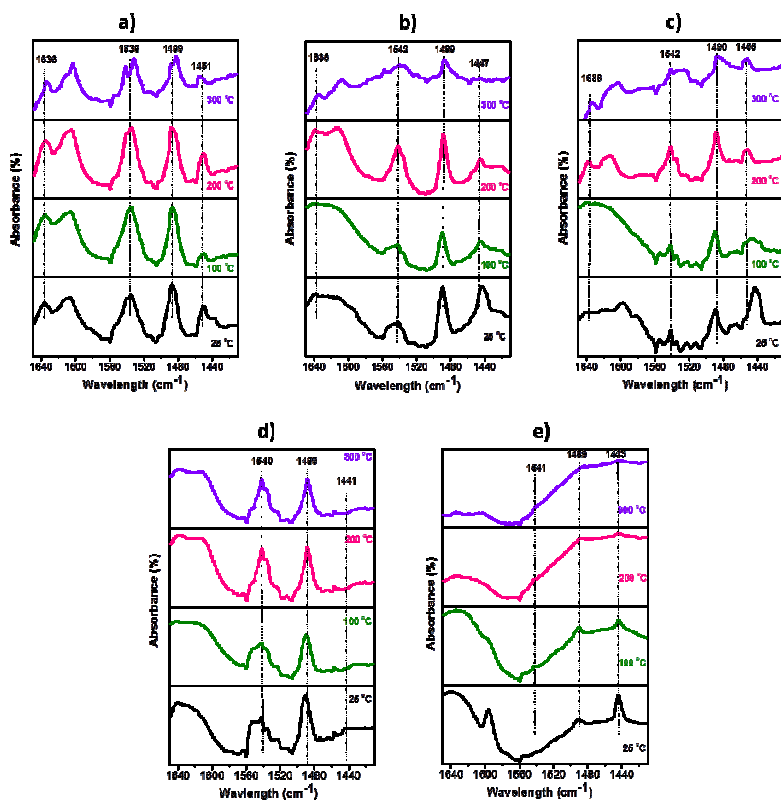

**Figure S1.** Py-FTIR of a) Sn-Mont, b) Zr-Mont, c) Al-Mont, d) Fe-Mont and e) Mont evacuated at different temperatures.

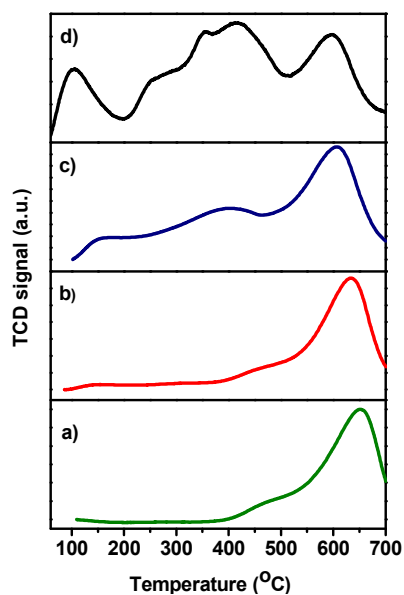

**Figure S2.** NH<sub>3</sub>-TPD of a) Fe-Mont, b) Al-Mont, c) Zr-Mont and d) Sn-Mont

## 2. Experimental procedure for synthesis of HMF derivatives

### 1.1 Synthesis of 5-(formyloxymethyl)furfural from HMF

In a typical experiment<sup>1</sup>, mixture of HMF (0.2 g) and formic acid (98%, 10 mL) was stirred at room temperature for 3 h. After completion of reaction it was neutralized with saturated solution of NaHCO<sub>3</sub>. Further reaction mixture diluted with ethyl acetate (20 mL) and washed with water (10 mL x 1), brine (10 mL x 1). The organic layer was finally dried over anhydrous Na<sub>2</sub>SO<sub>4</sub> and evaporated under reduced pressure. Residue was purified using column chromatography by eluting in ethyl acetate: pet ether (90: 10) mobile phase. After purification yellow oil of 5-(formyloxymethyl)furfural (0.212 g, 87%) was obtained.

### 1.2 Synthesis of 5-(acetyloxymethyl)furfural from HMF

In a typical experiment, mixture of HMF (0.2 g) and acetic acid (98%, 10 mL) was stirred at 50 °C for 4 h. After completion of reaction, it was neutralized with saturated solution of NaHCO<sub>3</sub>. Further reaction mixture diluted with ethyl acetate (20 mL) and washed with water (10 mL x 1), brine (10 mL x 1). The organic layer was finally dried over anhydrous Na<sub>2</sub>SO<sub>4</sub> and evaporated under reduced pressure. Residue was purified using column chromatography by eluting in ethyl acetate: pet ether (90: 10) mobile phase. After purification yellow oil of 5-(acetoxymethyl)furfural (0.218 g, 82%) was obtained.

### 1.3 Synthesis of 5-(chloromethyl)furfural from HMF

In typical experiment<sup>2</sup>, HMF (0.252 g, 2 mmol) was dissolved in CH<sub>2</sub>Cl<sub>2</sub> (10 mL) and HCl (aq. 37%, 5 mL) was added drop wise. Biphasic reaction mixture was stirred at room temperature for 24 h, then organic layer was separated, and acidic fraction was extracted with CH<sub>2</sub>Cl<sub>2</sub> (3 x 20 mL). Organic fractions were combined, dried over Na<sub>2</sub>SO<sub>4</sub>, and evaporated. Residue was purified by filtering through short silica gel column (ethyl acetate: pet ether, 90:10) to yield, 0.23 g (80%) as yellowish crystals.

### 1.4 Synthesis of 5-(bromomethyl)furfural from HMF

In a typical experiment<sup>2</sup>, HMF (0.252 g, 2 mmol) was dissolved in 1,2-dichloroethane (7 mL) and HBr (aq. 48%, 7 mL) was added drop wise. Biphasic reaction mixture was stirred at room temperature for 24 h, then organic layer was separated, and acidic fraction was extracted with CH<sub>2</sub>Cl<sub>2</sub> (3 x 20 mL). Organic fractions were combined, dried with Na<sub>2</sub>SO<sub>4</sub>, and evaporated. Residue was purified by filtering through short silica gel column (ethyl acetate: pet ether, 90:10) to yield, 0.319 g (85%) as yellowish crystals.

### 3. Characterisation of pure products: $^1\text{H}$ NMR and $^{13}\text{C}$ NMR

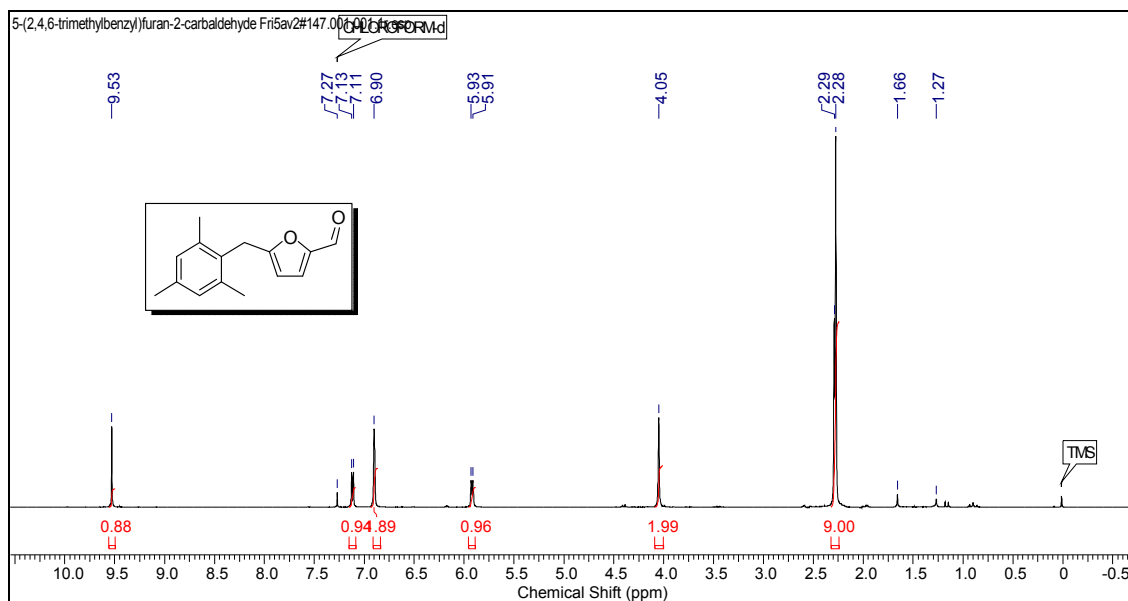

**5-(2,4,6-trimethylbenzyl)furan-2-carbaldehyde:**  $^1\text{H}$  NMR (200 MHz, CHLOROFORM-*d*)  $\delta$  ppm 2.28 - 2.29 (m, 9 H) 4.05 (s, 2 H) 5.91-5.93 (d,  $J=3.54$  Hz, 1 H) 6.90 (s, 2 H) 7.11-7.13 (d,  $J=3.54$  Hz, 1 H) 9.53 (s, 1 H)

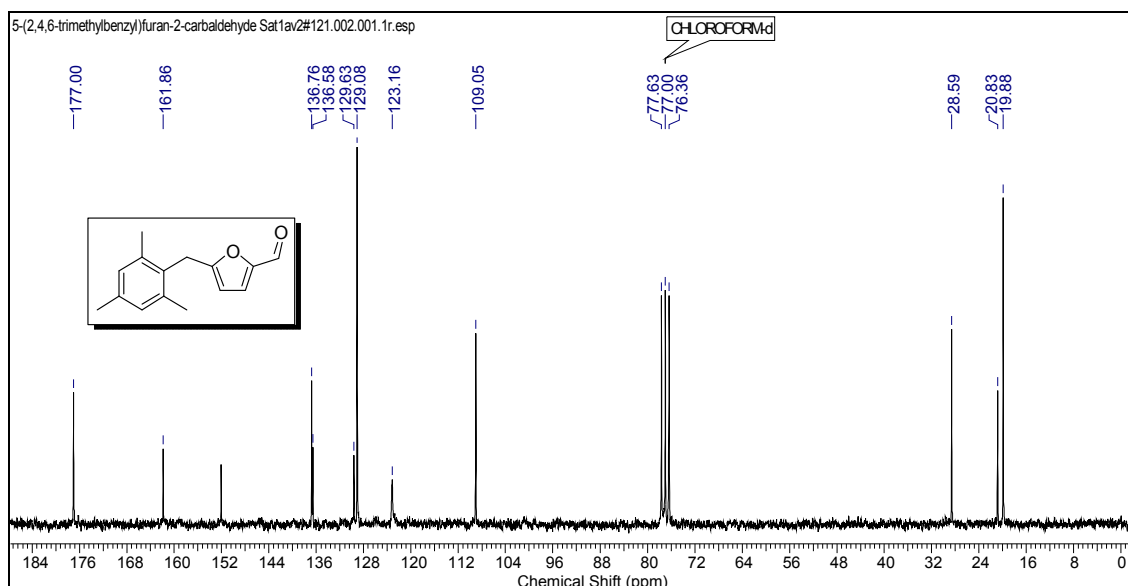

**5-(2,4,6-trimethylbenzyl)furan-2-carbaldehyde:**  $^{13}\text{C}$  NMR (50 MHz, CHLOROFORM-*d*)  $\delta$  ppm 19.88, 20.83, 28.59, 109.05, 123.16, 129.08, 129.63, 136.58, 136.76, 161.86, 177.00

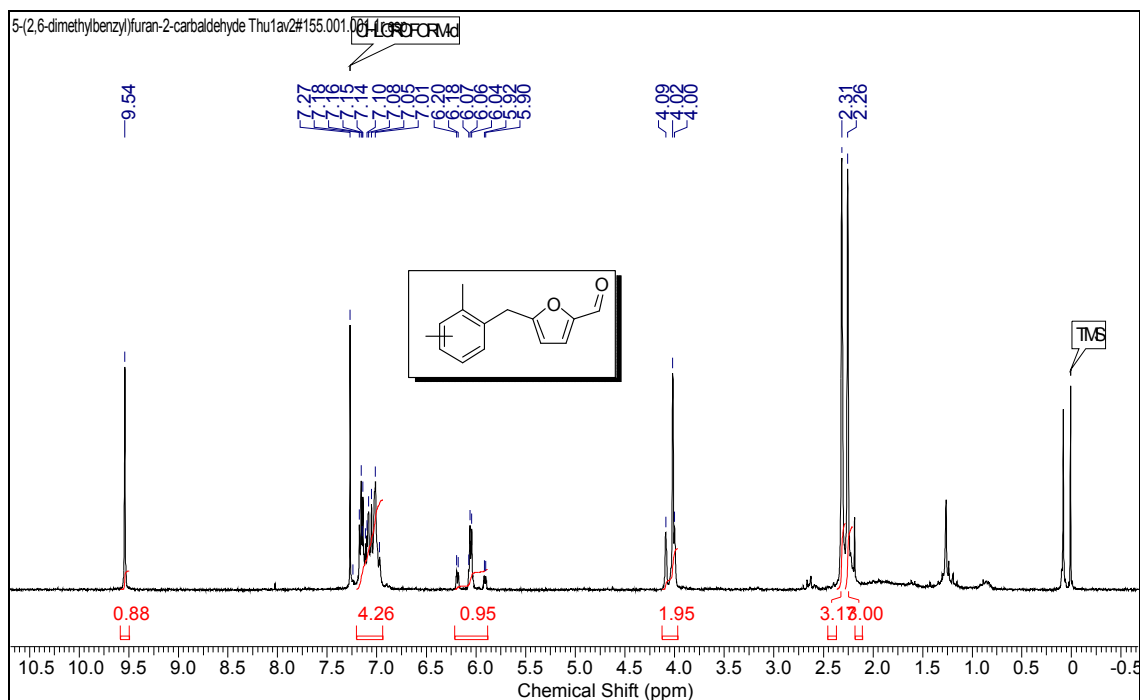

**5-(2, 6-dimethylbenzyl)furan-2-carbaldehyde:**  $^1\text{H}$  NMR (200 MHz, CHLOROFORM-*d*)  $\delta$  ppm  
 2.26 (s, 3 H) 2.31 (s, 3 H) 4.00 - 4.09 (m, 2 H) 5.90 - 6.20 (m, 1 H) 6.97 - 7.18 (m, 5 H) 9.54 (s, 1 H)

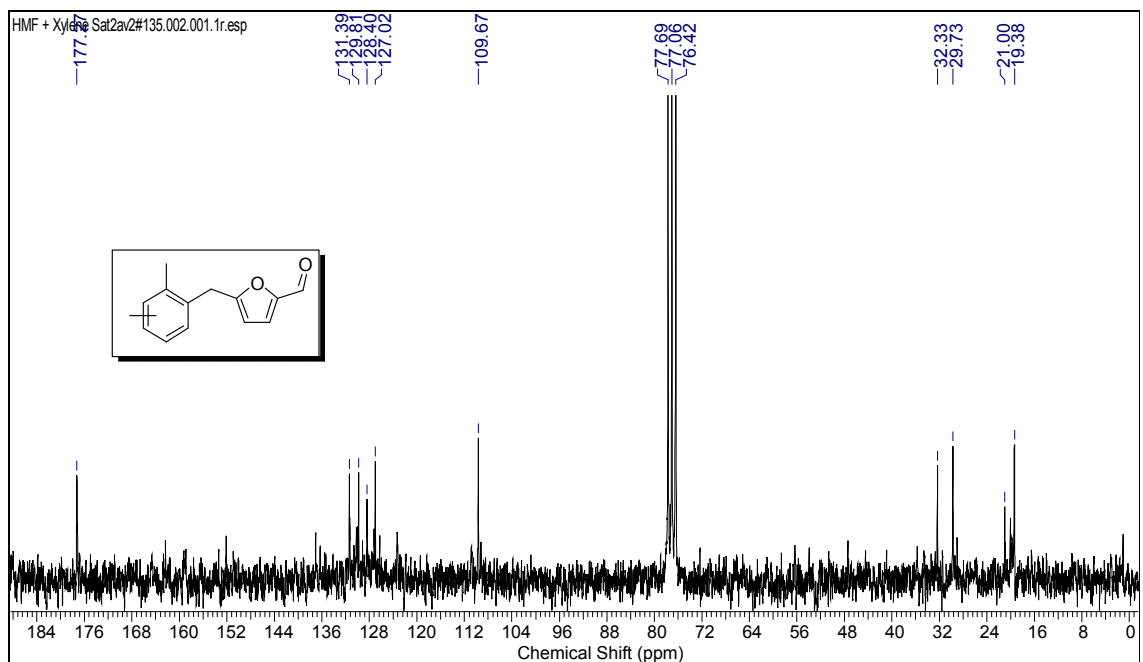

**5-(2, 6-dimethylbenzyl)furan-2-carbaldehyde:**  $^{13}\text{C}$  NMR (50 MHz, CHLOROFORM-*d*)  $\delta$  ppm  
 19.38, 21.00, 29.73, 32.33, 109.67, 127.02, 128.40, 129.81, 131.39, 177.27

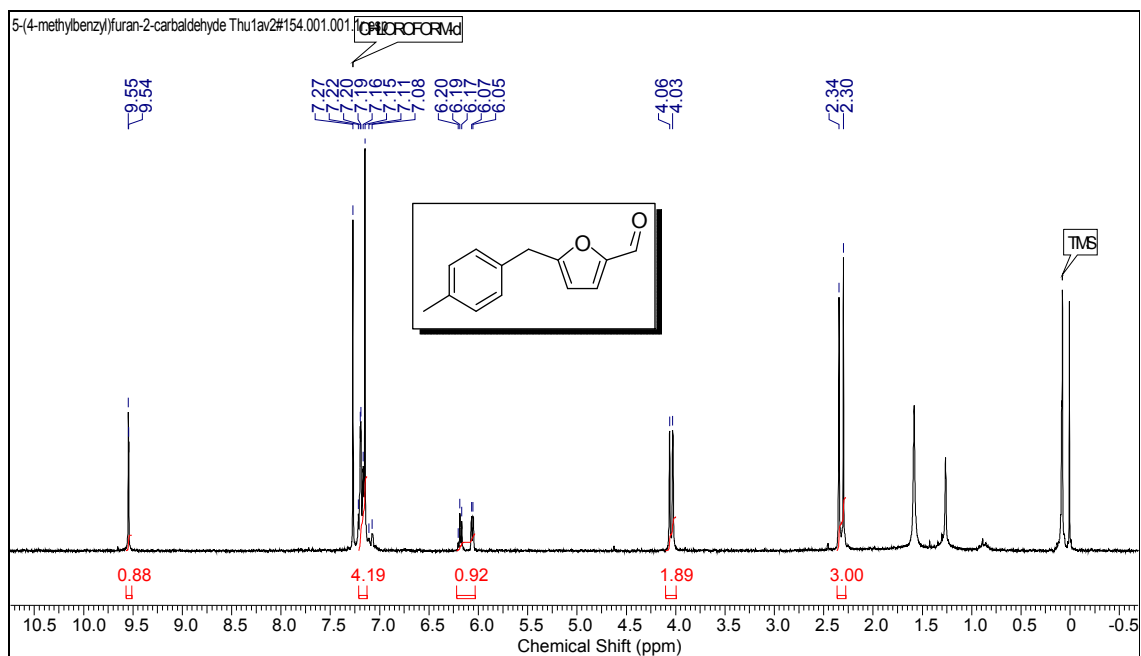

**5-(4-methylbenzyl)furan-2-carbaldehyde:**  $^1\text{H}$  NMR (200 MHz, CHLOROFORM-*d*)  $\delta$  ppm  
 2.30-2.34 (d,  $J=8.97$  Hz, 3 H) 4.03-4.04 (d,  $J=6.57$  Hz, 2 H) 6.05 - 6.20 (m, 1 H) 7.15 - 7.20 (m, 4 H)  
 9.54-9.55 (d,  $J=0.88$  Hz, 1 H)

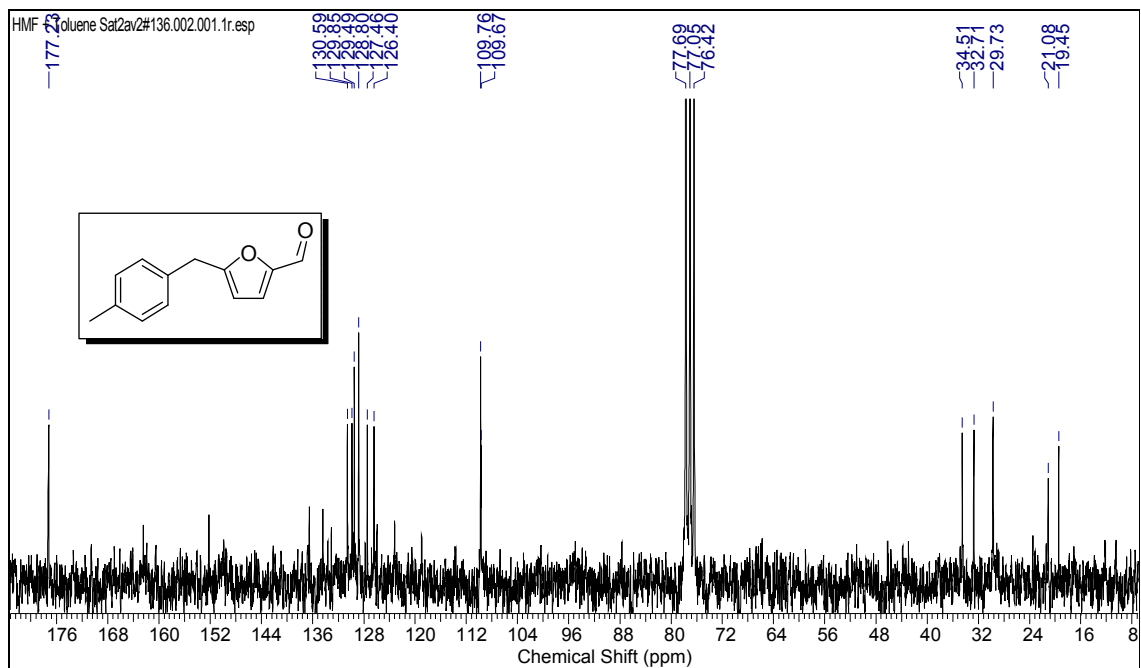

**5-(4-methylbenzyl)furan-2-carbaldehyde:**  $^{13}\text{C}$  NMR (50 MHz, CHLOROFORM-*d*)  $\delta$  ppm  
 19.45, 21.08, 29.73, 32.71, 34.51, 109.67 109.76, 126.40, 127.46, 128.80, 129.49, 129.85, 130.59,  
 177.23

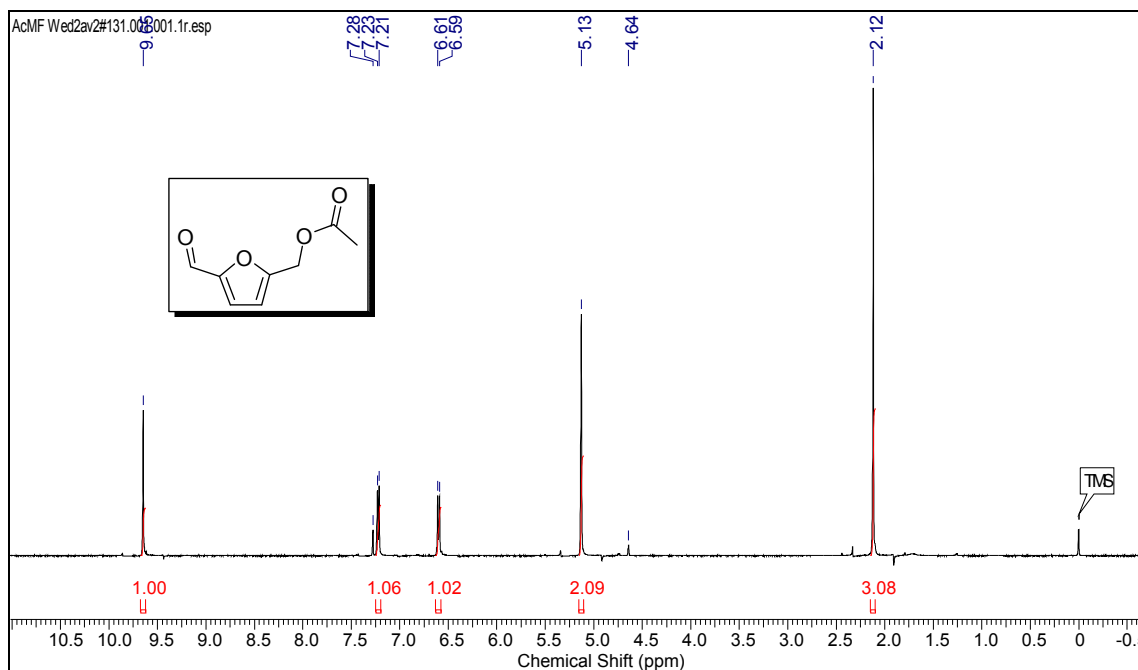

**5-(acetoxymethyl)furfural:**  $^1\text{H}$  NMR (200 MHz,  $\text{CDCl}_3$ )  $\delta$  ppm 2.12 (s, 3 H) 5.13 (s, 2 H) 6.60 (d,  $J=3.54$  Hz, 1 H) 7.22 (d,  $J=3.54$  Hz, 1 H) 9.65 (s, 1 H)

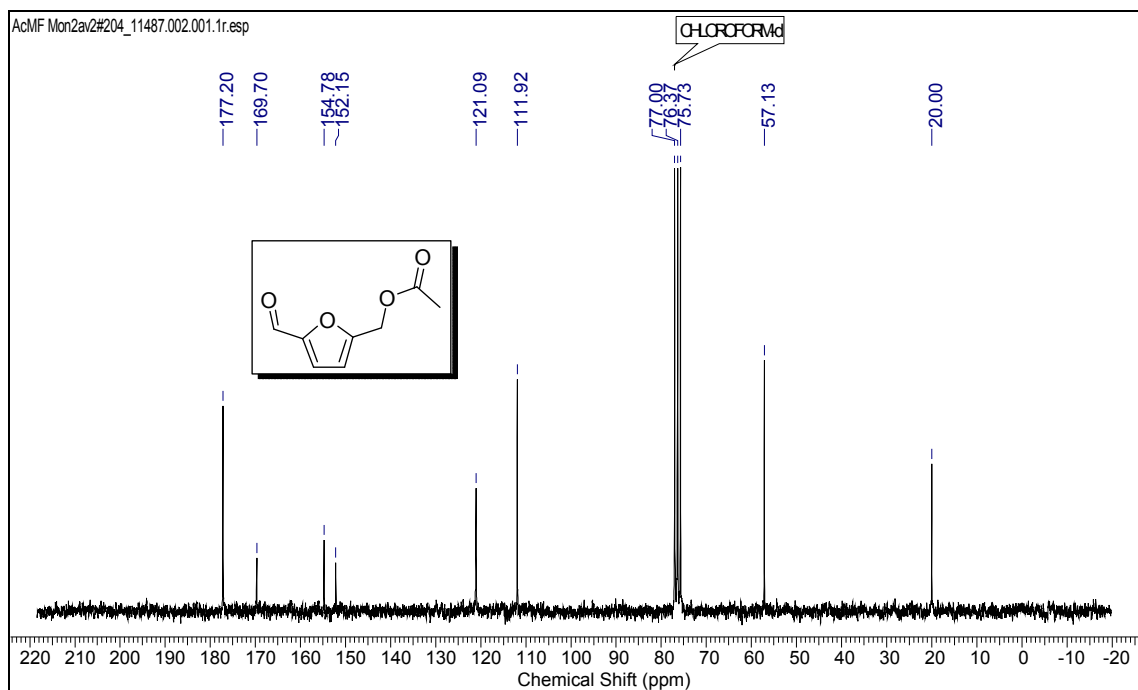

**5-(acetoxymethyl)furfural:**  $^{13}\text{C}$  NMR (50 MHz,  $\text{CDCl}_3$ )  $\delta$  ppm 20.00, 57.13, 111.92, 121.09, 152.15, 154.78, 169.70, 177.20.

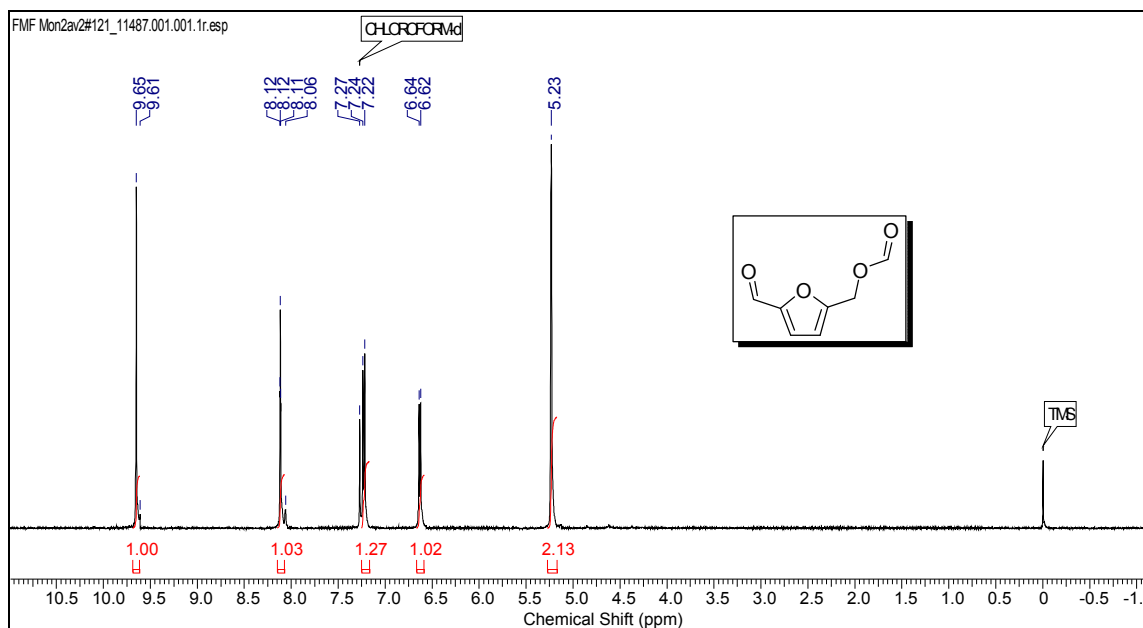

**5-(formyloxymethyl)furfural:**  $^1\text{H}$  NMR (200 MHz,  $\text{CDCl}_3$ )  $\delta$  ppm 2.12 (s, 3 H) 5.13 (s, 2 H) 6.60 (d,  $J=3.54$  Hz, 1 H) 7.22 (d,  $J=3.54$  Hz, 1 H) 9.65 (s, 1 H)

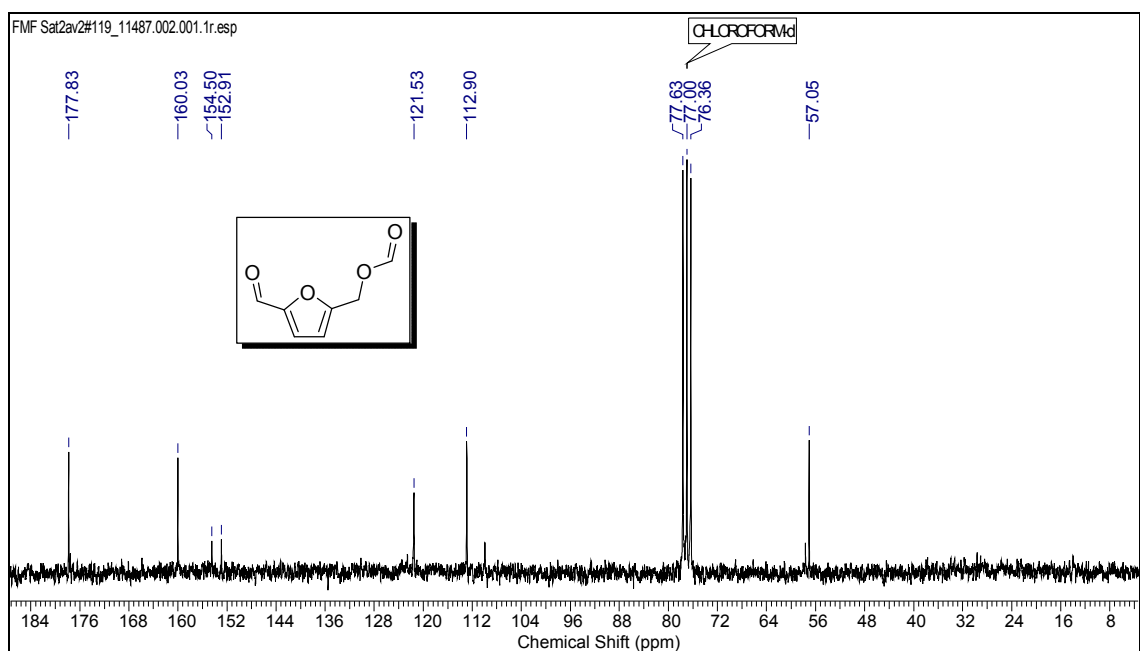

**5-(formyloxymethyl)furfural:**  $^{13}\text{C}$  NMR (50 MHz,  $\text{CDCl}_3$ )  $\delta$  ppm 57.05, 112.90, 121.53, 152.91, 154.50, 160.03, 177.83



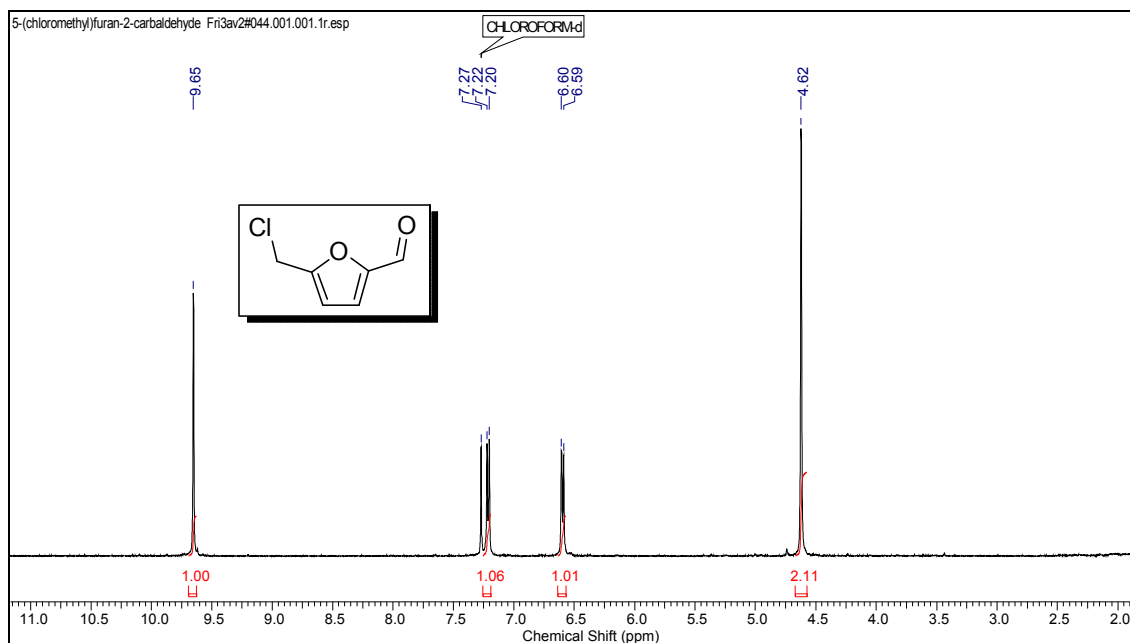

**5-(chloromethyl)furfural:**  $^1\text{H}$  NMR (200 MHz,  $\text{CDCl}_3$ ): 4.62 (s, 2H,  $\text{CH}_2\text{Cl}$ ), 6.59-6.60 (d,  $J=3.54\text{Hz}$ , 1H, ArH), 7.20-7.22 (d,  $J=3.54$ , 1H, ArH), 9.65 (s, 1H, CHO).

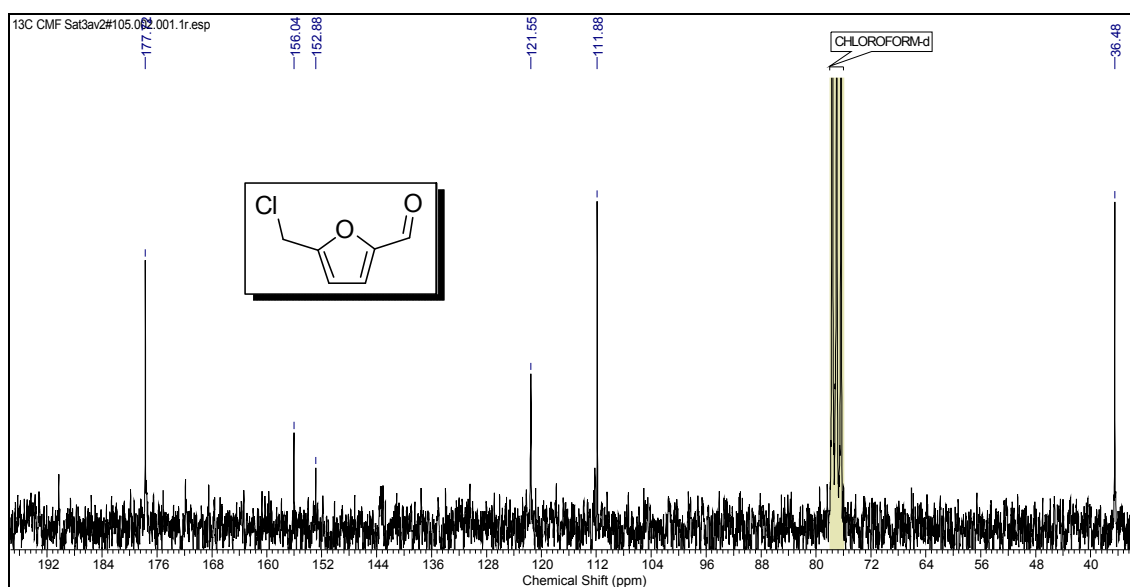

**5-(chloromethyl)furfural:**  $^{13}\text{C}$  NMR (50 MHz,  $\text{CDCl}_3$ ): 36.48 ( $\text{CH}_2\text{-Cl}$ ), 111.88 (Ar- $\text{CH}$ ), 121.55 (Ar- $\text{CH}$ ), 152.88 (Ar- $\text{C}$ ), 156.04 (Ar- $\text{C}$ ) and 177.72 ( $\text{CHO}$ ).

## References

1. X. Zhou, T. B. Rauchfuss, *ChemSusChem* **2013**, *6*, 383–388.
2. A. Bredihhin, U. Mäeorg, L. Vares, *Carbohydr. Res.* **2013**, *375*, 63–67.
